# Supplementary material for: Physical Characterization and In Vitro Toxicity Test of PDMS Synthesized from Low-Grade D4 Monomer as a Vitreous Substitute in the Human Eyes
Source: MDPI journal article supplement (doi:10.3390/jfb13010003), 2022-01-02
Supplement: s1 [file s1]

# Physical Characterization and In Vitro Toxicity Test of PDMS Synthesized from Low Grade D4 Monomer as A Vitreous Substitute in the Human Eyes

Diba Grace Auliya <sup>1,\*</sup>, Soni Setiadji <sup>2,3</sup>, Fitrilawati Fitrilawati <sup>1</sup> and Risdiana Risdiana <sup>1,\*</sup>

<sup>1</sup> Department of Physics, Faculty of Mathematics and Natural Sciences, Universitas Padjadjaran, Jl. Raya Bandung-Sumedang km 21 Jatinangor, Sumedang 45363, Indonesia; [fitrilawati@phys.unpad.ac.id](mailto:fitrilawati@phys.unpad.ac.id) (FF)

<sup>2</sup> Department of Chemistry, Faculty of Mathematics and Natural Sciences, Universitas Padjadjaran, Jl. Raya Bandung-Sumedang km 21 Jatinangor, Sumedang 45363, Indonesia; [s.setiadji@uinsgd.ac.id](mailto:s.setiadji@uinsgd.ac.id) (SS)

<sup>3</sup> Department of Chemistry, Faculty of Sciences and Technology, UIN Sunan Gunung Djati Bandung, Jl. A.H. Nasution No. 105 Cibiru, Bandung 40614, Indonesia

\* Correspondence: [diba15001@mail.unpad.ac.id](mailto:diba15001@mail.unpad.ac.id) (DGA); [risdiana@phys.unpad.ac.id](mailto:risdiana@phys.unpad.ac.id) (RR)

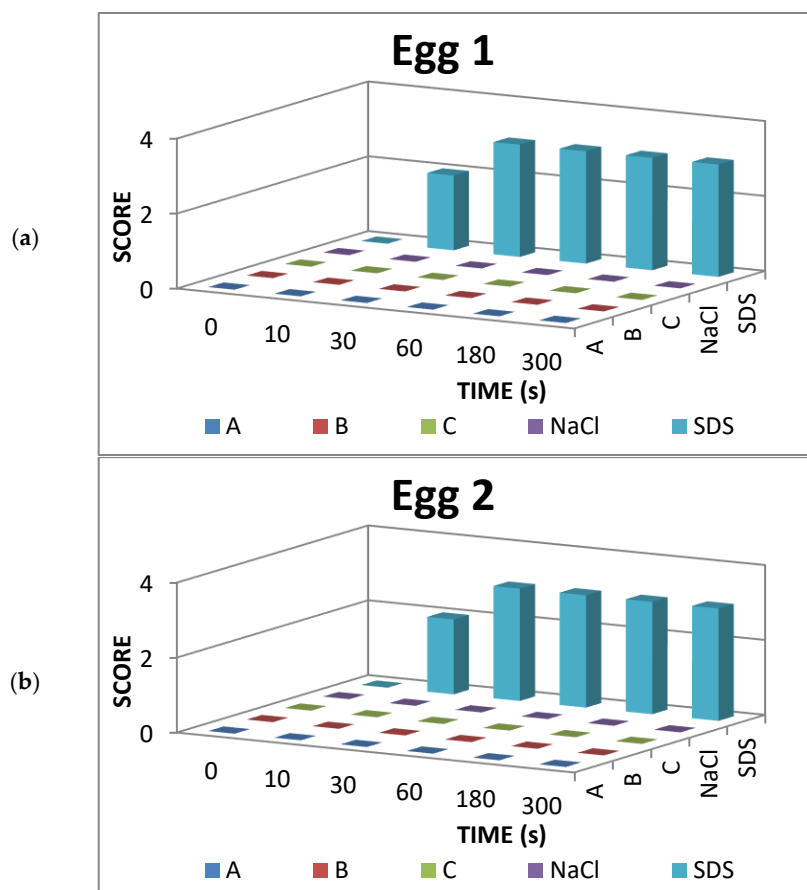

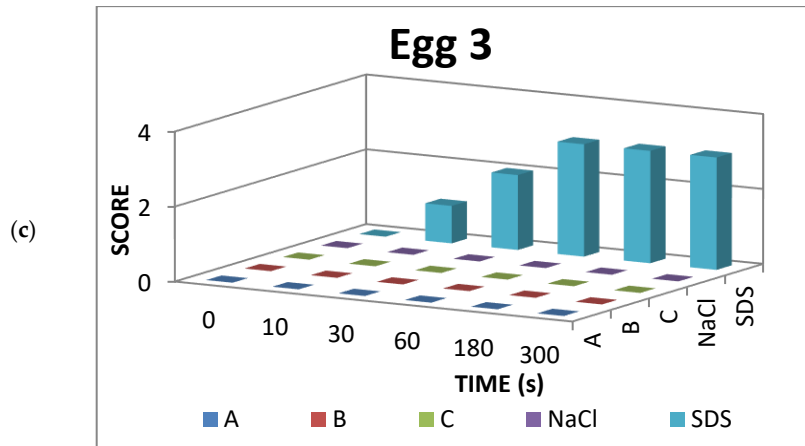

**Figure S1.** Hemorrhage score of (a) egg 1, (b) egg 2, and (c) egg 3. Egg 1 and egg 2 showed same score at the same time. Egg 3 had a different score for SDS at 10s and 30s with score of 1 and 2 while the other eggs had score of 2 and 3. Only SDS (positive control) had a hemorrhage in the egg's veins.

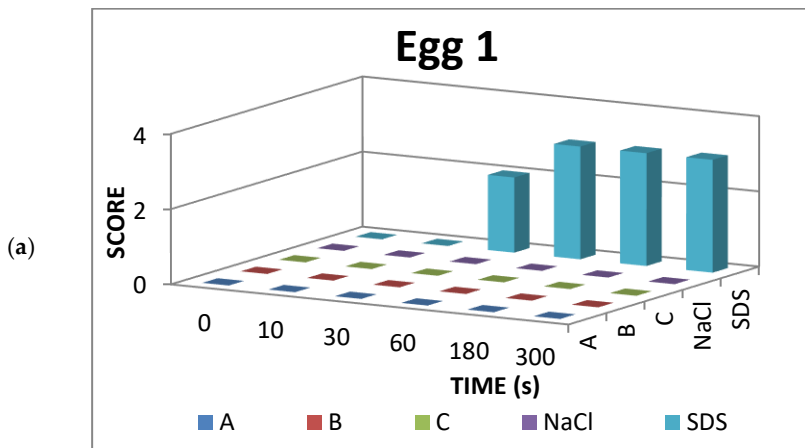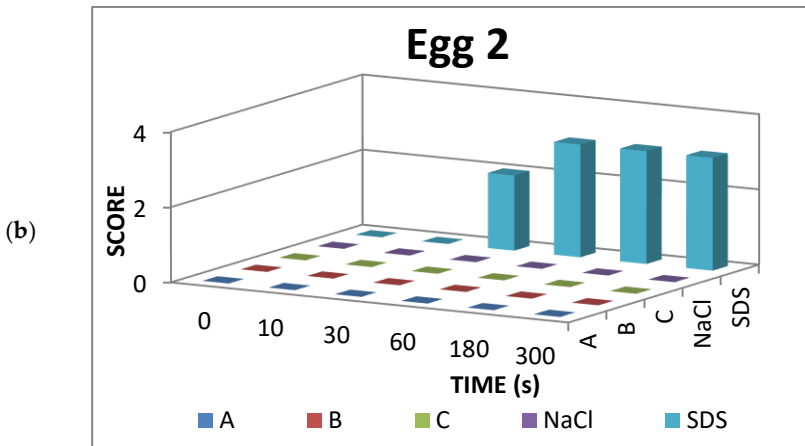

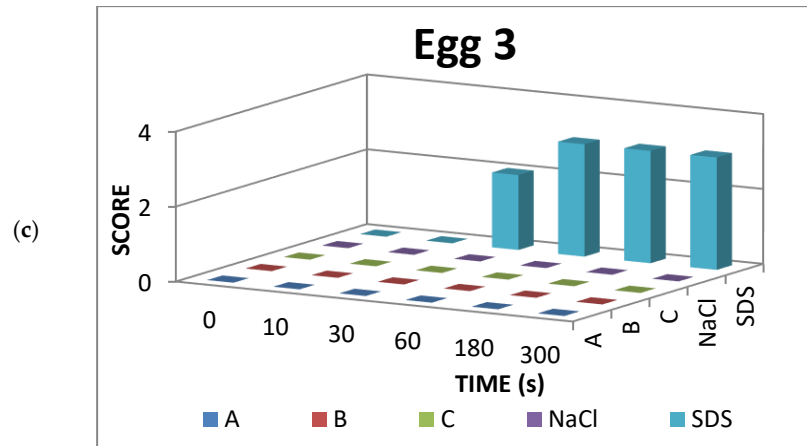

**Figure S2.** Lysis score of (a) egg 1, (b) egg 2 and (c) egg 3. All eggs showed same score at the same time. Only SDS (positive control) had a lysis in the egg's veins.

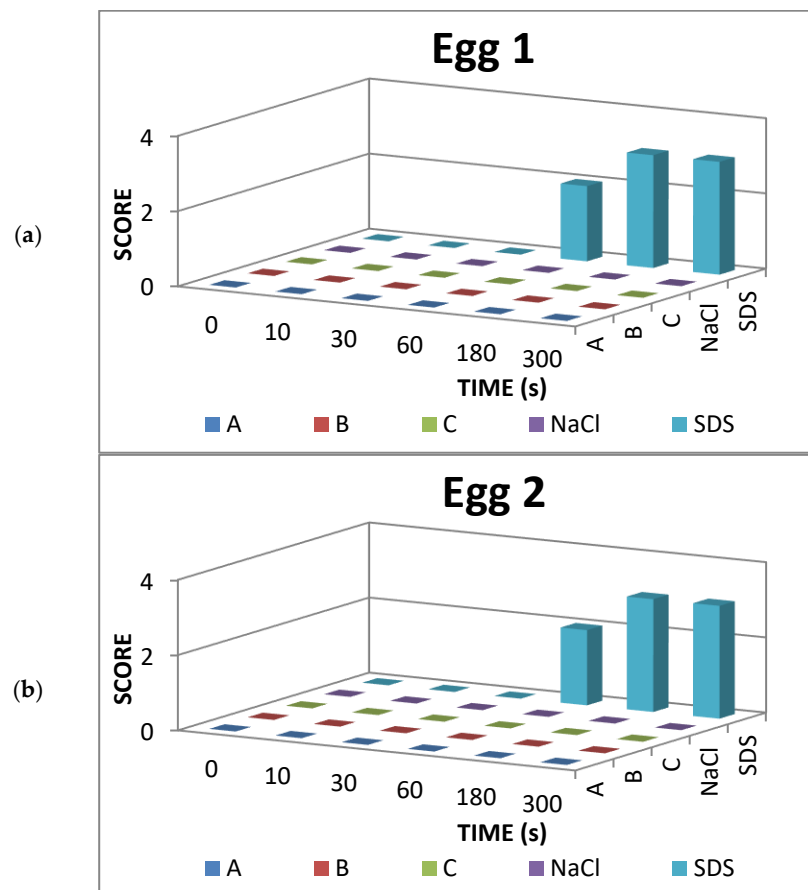

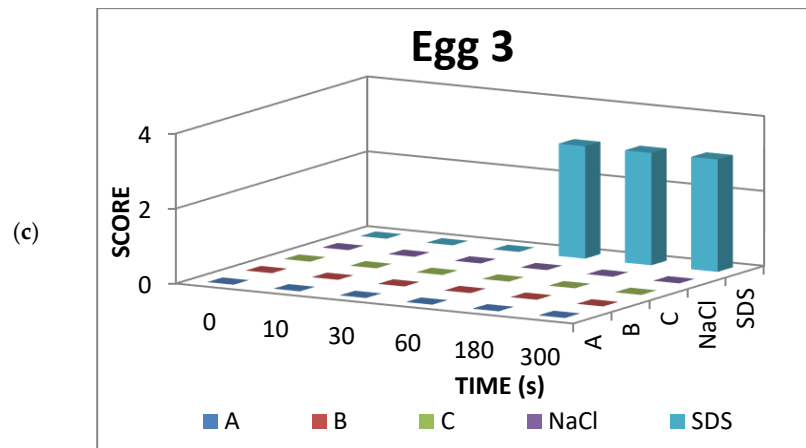

**Figure S3.** Coagulation score of (a) egg 1, (b) egg 2 and (c) egg 3. Egg 3 had a different score for SDS at 60s with score of 2 while the other eggs had score of 3. Only SDS (positive control) had a coagulation in the egg's veins.

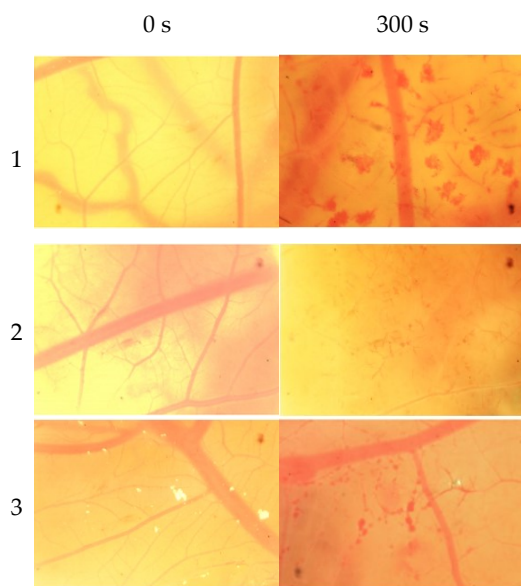

**Figure S4.** Vessels of positive control. The numbers 1, 2 and 3 represent egg 1, 2, and 3 for positive control group. All vessels of positive control group were damaged at 300s during HET-CAM test.

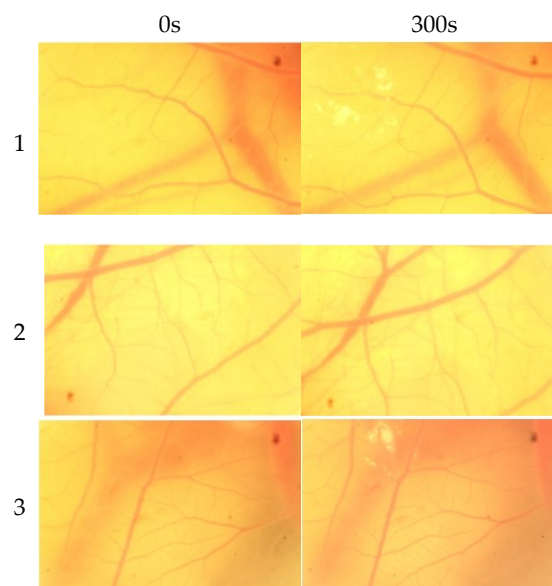

**Figure S5.** Vessels of sample A. The numbers 1, 2 and 3 represent egg 1, 2, and 3 for sample A group. All vessels of sample A group were not damaged during HET-CAM test.

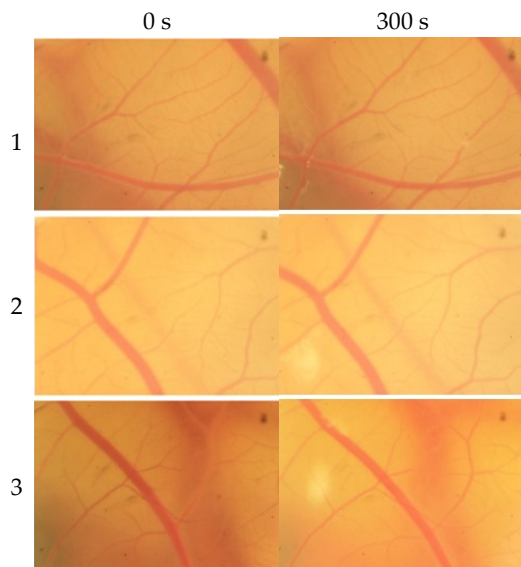

**Figure S6.** Vessels of sample B. The numbers 1, 2 and 3 represent egg 1, 2, and 3 for sample B group. All vessels of sample B group were not damaged during HET-CAM test.

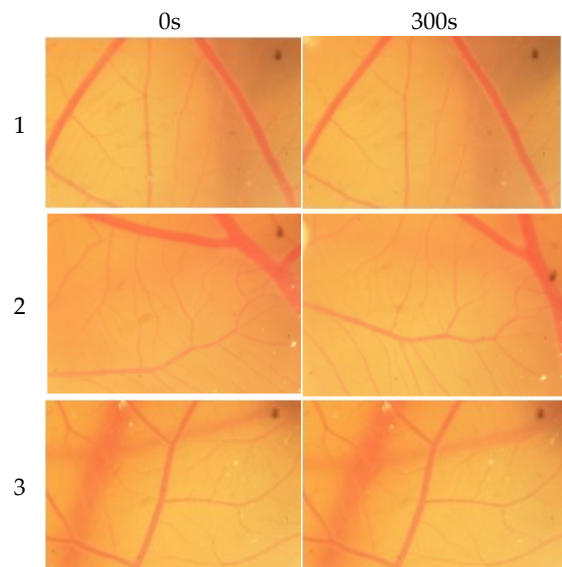

**Figure S7.** Vessels of sample C. The numbers 1, 2 and 3 represent egg 1, 2, and 3 for sample C group. All vessels of sample C group were not damaged during HET-CAM test.

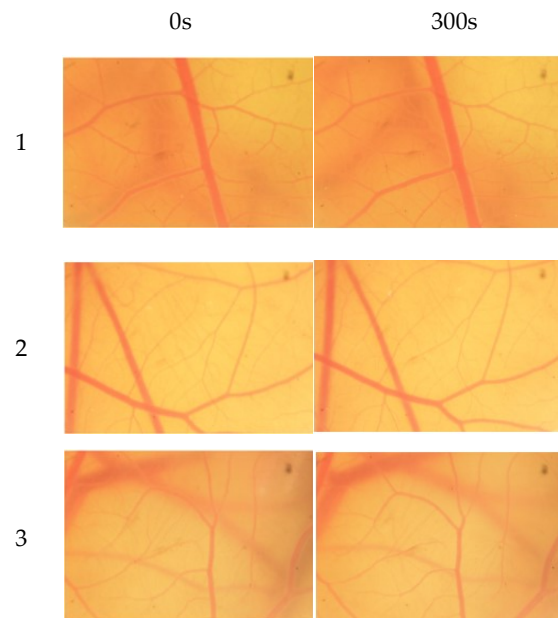

**Figure S8.** Vessels of the negative control. The numbers 1, 2 and 3 represent egg 1, 2, and 3 for negative control group. All vessels of sample C were not damaged during HET-CAM test.
